# Supplementary material for: Glaciochemical investigations of the ice deposit of Vukušić Ice Cave, Velebit Mountain, Croatia
Source: Copernicus journal article supplement (doi:10.5194/tc-5-485-2011), 2011-06-06
Supplement: Supplementary file 1 [file Supplementary Online Material_new.xls]

## Sheet: Munka1
	Rb	Sr	Y	Ba	Pb	U	Ce	Mg	Cr	Mn	Fe	Co	Cu	Zn	Al	As	Ca	Na	K	Ni	B	Mo	Cd
VS 1.1	0.489275	3.485	0.0167	0.184881	0.5	0.0541	0.0316	64.9417	0.27011	1.06933	20.1085	0.0427669	0.433968	34.4125	115.072	0.319758	3567.64	764.743	451.995	0.453136	1.75787	0.131127
VS 1.2	0.296475	2.1391	0.0102	1.07638	0.3404		0.0272	46.5695	0.21591	0.755034	20.3078	0.0222669	0.460668	55.151	33.3477	0.126758	2588.19	477.979	266.352	0.0112362	0.26147
VS 1.3	0.895675	3.0987	0.0149	3.49788	0.5629		0.0335	97.8676	1.51721	7.90053	32.066	0.102667	2.24977	147.763	39.5394	0.143958	3103.45	1993.5	1252.88	1.03494	6.29457	0.355727
VS 1.4	0.348775	2.3577	0.0203	1.69138	0.279	0.011	0.051	68.4943	0.61931	10.4172	35.6373	0.0400669	0.246968	98.2011	56.5092	0.108558	3070.04	639.265	390.234	0.774236	1.01947
VS 1.5	0.472775	1.8645	0.0113	0.407281	0.2252	0.0077	0.0336	48.6771	0.29381	6.72803	28.6448	0.0382669	0.113268	61.8794	74.4981	0.211258	2782.59	546.093	509.027		0.78457
VS 1.6	0.157975	1.7967	0.0098	0.879481	0.1674	0.0068	0.0256	45.8048	0.31111	4.54283	24.8339	0.0221669	0.129768	100.815	20.5833	0.0526575	2735.47	364.571	213.583	0.548436
VS 2.1	0.0829749	2.3228		0.0215809	0.1221	0.0166	0.0182	27.8387	0.08681	2.76233	15.8976	0.0116669	0.0777677	31.4386	22.1349	0.0953575	3268.75	129.913	73.7804
VS 2.2	0.300475	2.8895	0.0164		0.3018	0.0337	0.045	47.1422	0.26281	4.72983	27.3229	0.0748669	0.228368	31.8772	137.285	0.324358	3571.74	376.257	308.181	0.343336	0.0981704	0.00742717
VS 2.3	0.147875	2.1646	0.0103	0.493281	0.1723	0.0108	0.0323	41.2023	0.20451	4.46463	19.9047	0.0186669	0.0968677	55.6855	20.8777	0.218358	3160.92	230.56	179.843
VS 2.4	0.0992749	2.863	0.016		0.1446	0.0258	0.0491	53.7523	0.13231	5.37823	20.8814	0.0267669	0.0356677	32.4477	53.6038	0.154958	4022.86	136.863	81.5475	0.356536
VS 2.5	0.0901749	2.1511			0.0921	0.0175	0.0176	37.9272	0.05211	3.73963	14.4835	0.0114669	0.0379677	74.8986	40.9461	0.0742575	3605.79	123.852	121.41	0.539936
VS 2.6	0.468875	5.1049	0.0171	0.164081	0.4629	0.1176	0.0691	78.2304	0.08501	13.4321	54.9947	0.0871669	0.101868	11.7957	231.477	1.06216	6052.67	153.163	129.758	0.160536	1.42207	0.169327
VS 3.1	0.353275	4.3942	0.0147	0.0974809	0.4356	0.0696	0.0502	77.296	0.21161	7.38383	60.6179	0.132267	0.244268	21.6888	186.197	0.423658	4857.21	549.137	264.227	0.0883362	0.64997	0.0282272
VS 3.2	0.406975	2.9235	0.0159	0.234881	0.394	0.0217	0.0551	62.9599	0.43201	1.65293	44.5581	0.0567669	0.788368	35.3205	111.133	0.330658	3527.61	816.343	424.446	0.0352362	0.66987
VS 3.3	0.271475	2.6594	0.0149	1.13528	0.3079	0.0168	0.0497	60.0628	0.33371	6.12563	43.3931	0.0359669	0.144868	73.6478	62.7587	0.228258	3283.69	679.499	332.594		0.32287
VS 3.4	0.221475	3.1172	0.0104	1.13648	0.2618	0.0241	0.0346	63.2404	0.30221	6.57833	37.9924	0.0335669	0.155068	43.5686	65.1022	0.145658	3876.08	549.754	287.042
VS 3.5	0.145075	2.743		0.0915809	0.1886	0.0251	0.0335	49.4514	0.13791	4.92973	30.5765	0.0211669	0.0339677	43.1049	44.9879	0.181058	3400.89	210.798	127.525
VS 3.6	0.250675	6.0686		0.289981	0.0561	0.0704		110.481	0.15021	3.06163	5.01289	0.0335669	0.354668	14.271	118.552	0.188458	4919.83	426.519	245.766		0.13387
VS 4.1	0.131875	3.4825		0.981481	0.208	0.0213	0.0217	56.5459	0.32311	3.02663	31.7985	0.0267669	0.137068	30.3699	41.9263	0.148258	4129.66	215.807	135.554
VS 4.2	0.176075	2.4575		1.40108	0.2351	0.0143	0.0225	56.6757	0.33801	4.55143	22.0021	0.0223669	0.114968	44.1324	16.9969	0.122158	3045.51	486.223	241.192
VS 4.3	0.122575	2.2534		0.698281	0.1751	0.0148	0.0167	47.066	0.16601	5.27953	19.866	0.0241669	0.153268	35.6074	21.5438	0.0907575	3219.3	328.727	165.028
VS 4.4	0.102875	2.1379		0.374781	0.1312	0.0221	0.023	41.6429	0.10741	3.45363	19.9724	0.0184669	0.168868	30.1632	24.1968	0.103758	3077.05	237.939	122.104
VS 4.5	0.0838749	2.114			0.1774	0.0199	0.0325	35.4606	0.15901	1.85143	18.1053	0.0154669	0.0276677	14.637	52.2584	0.301058	2925.25	109.464	90.2486
VS 4.6	2.56177	33.8935	0.0207	8.55958	0.3448	0.3141	0.0297	702.99	0.02601	29.6312	23.935	0.127067	0.0923677	11.6663	9.18946	2.03456	34653.5	598.343	696.855	0.00413622	9.30777	0.255227	0.0167457
VS 6.1	1.92087	19.9956	0.0125	10.9417	0.1673	0.1804	0.0475	408.009	0.38551	48.5169	37.9118	0.155667	0.648468	30.6098	57.509	1.62546	19386.5	365.046	207.02	0.280336	6.28277	0.187327	0.0103457
VS 6.2	13.4177	45.6665	0.028	17.5186	0.2944	0.767	0.0704	1632.37	0.13631	323.796	71.3454	0.474767	0.236568	9.49531	18.1018	3.37196	47476	280.149	691.922	0.870436	31.1245	1.46463
VS 6.3	1.30837	4.2696	0.0337	1.28628	0.273	0.0631	0.1236	153.714	0.28721	8.30163	64.6935	0.139467	1.15217	32.9129	138.031	0.751458	4647.02	149.362	92.9796	0.0872362	1.67847	0.0835272
VS 6.4	1.40247	5.4767	0.0139	2.77168	0.161	0.0499	0.0558	156.266	0.58661	20.4272	35.1476	0.142367	0.225168	59.3893	149.218	0.700858	5386.97	597.128	294.281	0.00993622	1.55117	0.0997272
VS 6.5	4.06417	11.6105	0.0216	1.91008	0.464	0.2189	0.083	384.556	0.17681	31.4471	88.3304	0.175667	0.115368	5.49271	121.486	1.54916	12500.4	95.523	239.28	0.0945362	5.47407	0.322727
VS 6.6	0.930475	4.5204	0.0241	0.942781	0.1999	0.0606	0.0884	115.238	0.25441	10.5605	57.8541	0.133267	0.0381677	24.5232	203.262	0.368958	4984.42	110.516	69.4466		0.0814704
VS 7.1	4.52977	24.3464	0.0098	7.50688	0.1257	0.4173	0.0366	719.333	0.44661	46.8705	23.7633	0.263067	0.0133677	19.2651	47.8841	1.14996	22439.9	237.918	416.95	0.111236	9.71967	0.592027
VS 7.2	1.88527	10.6575		2.37128	0.1082	0.2912	0.0277	309.931	0.18951	19.6446	16.4399	0.304567	0.136568	12.9269	43.7924	0.545158	10533.8	190.804	206.429	0.388236	2.16527	0.199127
VS 7.3	0.227275	5.9862	0.0097	2.64668	0.2071	0.0367	0.0353	96.5167	0.13311	32.241	30.9553	0.0392669	0.167668	119.493	33.7104	0.131858	6878.37	109.888	35.6743
VS 7.4	0.167375	6.637		0.922781	0.0944	0.0723		115.608	0.11051	5.00333	3.81769	0.0208669		22.2778	26.8644	0.167158	6131.13	94.8722	23.4769
VS 7.5	0.164675	4.408			0.1678	0.0473	0.0209	76.8752	0.15241	4.01223	15.0011	0.0486669	0.0933677	21.5018	69.7086	0.110058	3722.66	58.8087	21.7961
VS 7.6	0.0707749	2.2746			0.1353	0.0284	0.0181	55.7524	0.04541	7.15553	14.2716			38.7083	24.8826	0.0834575	2767.92	54.1787
values are in ng/g
empty cells means: below limit of detection (<0.01ng/g)
